# Supplementary material for: Unleashing the glow: upconverting nanoparticles recharge persistent luminescent materials – applications in 3D-printing and optical coding
Source: Royal Society of Chemistry journal article supplement (doi:10.1039/d4tc01692k), 2024-01-01
Supplement: d4tc01692k1.pdf [file d4tc01692k1.pdf]

Supporting Information

for

**Unleashing the Glow: Upconverting Nanoparticles Recharge Persistent Luminescent Materials – applications in 3D-printing and optical coding**

Adrian Drozdowski<sup>1</sup>, Dirk Poelman<sup>2</sup>, Marcin Runowski<sup>1</sup>, Hanoch Hemmerich<sup>3</sup>, Fernando Rivera-López<sup>4</sup>, Tomasz Grzyb\*<sup>1</sup>

<sup>1</sup>*Department of Rare Earths, Faculty of Chemistry, Adam Mickiewicz University, Poznan, Poland*

<sup>2</sup>*Lumilab, Department of Solid State Sciences, Faculty of Sciences, Ghent University, Ghent, Belgium*

<sup>3</sup>*Departamento de Física, IUdEA, IMN and MALTA Consolider Team, Universidad de La Laguna, San Cristóbal de La Laguna E-38200, Santa Cruz de Tenerife, Spain*

<sup>4</sup>*Departamento de Ingeniería Industrial, Escuela Superior de Ingeniería y Tecnología Universidad de La Laguna, San Cristóbal de La Laguna E-38200, Santa Cruz de Tenerife, Spain*

E-mail: tgrzyb@amu.edu.pl

### **1. Ln oleate precursors preparation**

In a standard synthesis of rare earth (RE) oleate, 60 mmol of RE oxide (RE<sub>2</sub>O<sub>3</sub>) was dissolved in a water solution of hydrochloric acid (in 10 mL water to 17 mL acid ratio). The obtained mixture was heated twice to near evaporation of all water, and then the remaining solution was diluted in 80 mL of water. The solution was mixed with 120 mL of ethanol and 210 mL of n-hexane in a three-neck round bottom flask, adding 180 mmol of sodium oleate. After that, the mixture was heated for 18 h at 60 °C under reflux. Next, the hexane phase was collected, and the solvent evaporated, resulting in solid RE oleate.

## 2. UCNPs purification

Nanoparticles were isolated in the following procedure: 1 – centrifugation of after-synthesis mixture at 8,000 g for 5 min; 2 – dispersing the precipitate in 5 mL of n-hexane and then adding ethanol to the 40 mL total; 3 – dispersing the obtained precipitate in 15 mL of n-hexane and centrifugation at 2,000 g for 5 min; 4 – in the end, the supernatant was agitated with 25 mL of ethanol and centrifuged for 7 min at 10,000 g.

## 3. Spectroscopic characterization

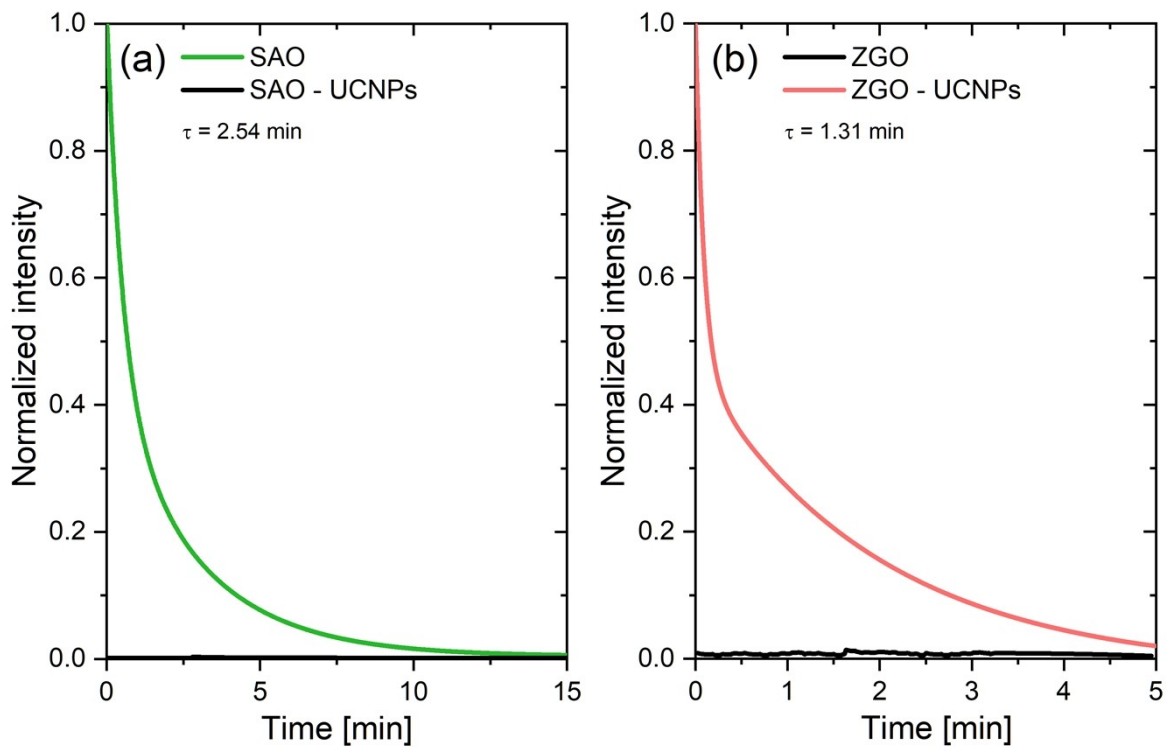

**Fig. S1.** Normalized decay curves of (a) SrAl<sub>2</sub>O<sub>4</sub>:Eu<sup>2+</sup>,Dy<sup>3+</sup> (SAO), SrAl<sub>2</sub>O<sub>4</sub>:1%Eu<sup>2+</sup>,0.5%Dy<sup>3+</sup>-UCNPs (SAO-UCNPs) and (b) ZnGa<sub>2</sub>O<sub>4</sub>:0.5%Cr<sup>3+</sup> (ZGO) and the composite ZnGa<sub>2</sub>O<sub>4</sub>:0.5%Cr<sup>3+</sup>-UCNPs (ZGO-UCNPs) materials after 5 min irradiation with a 975 nm laser with a power density of 6 W·cm<sup>-2</sup>. The curves for ZGO and SAO were normalized by dividing them by the maximum emission intensity of the corresponding sample containing UCNPs.

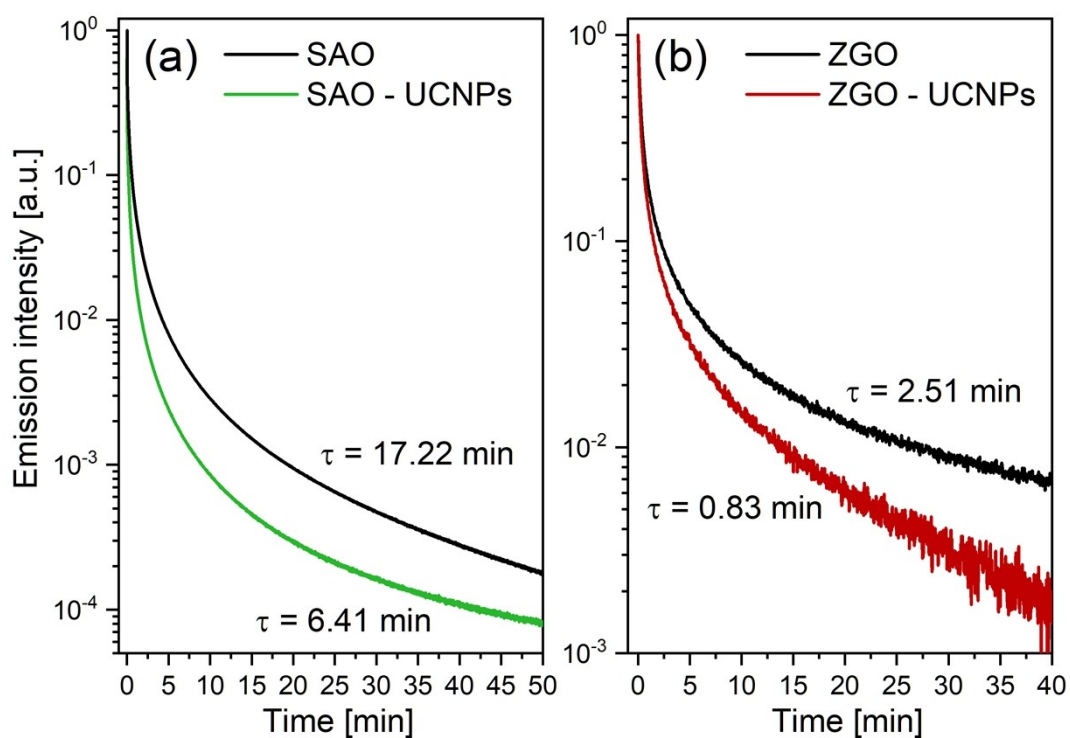

**Fig. S2.** Normalized decay curves of (a)  $\text{SrAl}_2\text{O}_4:\text{Eu}^{2+},\text{Dy}^{3+}$  (SAO) and  $\text{SrAl}_2\text{O}_4:1\%\text{Eu}^{2+},0.5\%\text{Dy}^{3+}\text{-UCNPs}$  (SAO-UCNPs) and (b)  $\text{ZnGa}_2\text{O}_4:0.5\%\text{Cr}^{3+}$  (ZGO) and the composite  $\text{ZnGa}_2\text{O}_4:0.5\%\text{Cr}^{3+}\text{-UCNPs}$  (ZGO-UCNPs) measured under pulsed (5 s pulse) irradiation with a 375 nm 50 mW laser and PMT as a detector.
